# Supplementary material
Source: MDPI journal article supplement (https://www.mdpi.com/2304-6740/3/2/230)
Supplement: s1 [file s1]

## Supporting Information

### Understanding of the regioselective hydrolysis of human serum albumin by Zr(IV)-substituted polyoxotungstates using tryptophan fluorescence spectroscopy

Vincent Goovaerts, Karen Stroobants, Gregory Absillis and Tatjana N. Parac-Vogt\*

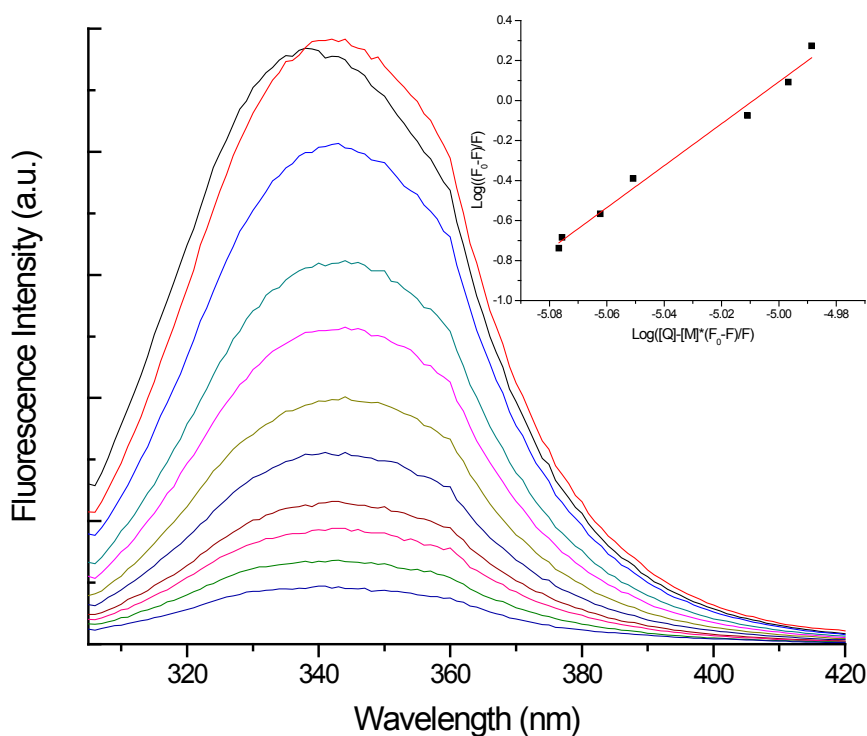

**Figure S1.** Emission fluorescence spectra of HSA in the absence and presence of different concentrations of Zr4-WD2 ( $[\text{HSA}] = 10^{-5}$  M,  $\text{pH} = 7.4$ ). From top to bottom, the concentration of Zr4-WD2 increased stepwise from 0 to  $10^{-5}$  M with increments of  $10^{-6}$  M. In the inset, the plot of the Tachiya equation is given (with  $R^2 = 0.99$ ). From the plot,  $K_a$  and  $m$  were calculated to be  $2.8 \times 10^5 \text{ M}^{-1}$  and 2.05, respectively.

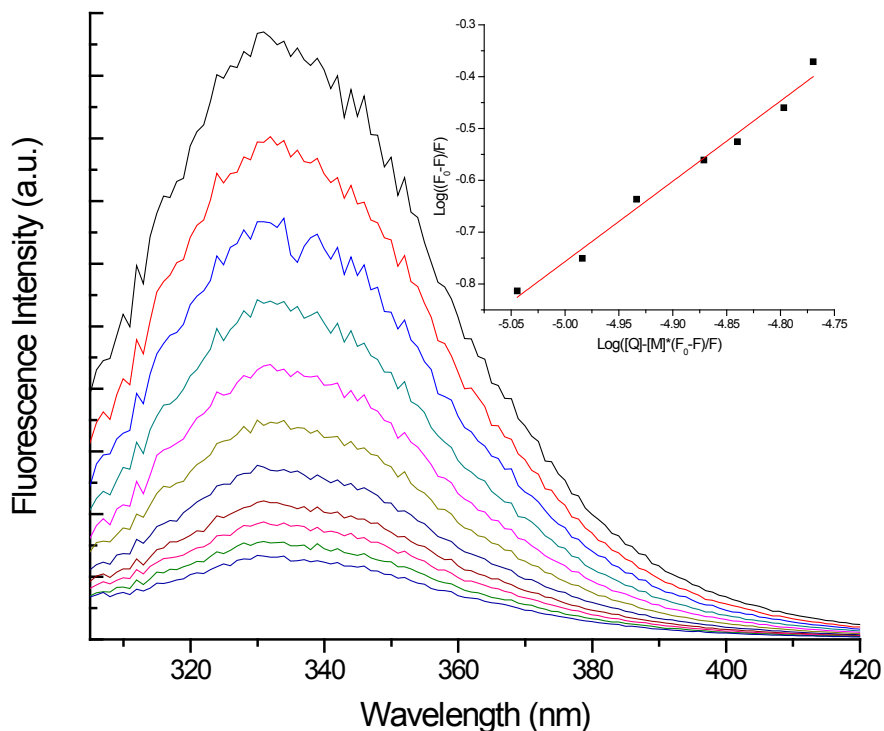

**Figure S2.** Emission fluorescence spectra of HSA in the absence and presence of different concentrations of Zr1-WD2 ([HSA] =  $10^{-5}$  M, pH = 7.4). From top to bottom, the concentration of Zr1-WD2 increased stepwise from 0 to  $10^{-5}$  M with increments of  $10^{-6}$  M. In the inset, the plot of the Tachiya equation is given (with  $R^2 = 0.99$ ). From the plot,  $K_a$  and  $m$  were calculated to be  $5.1 \times 10^5 \text{ M}^{-1}$  and 1.52, respectively.

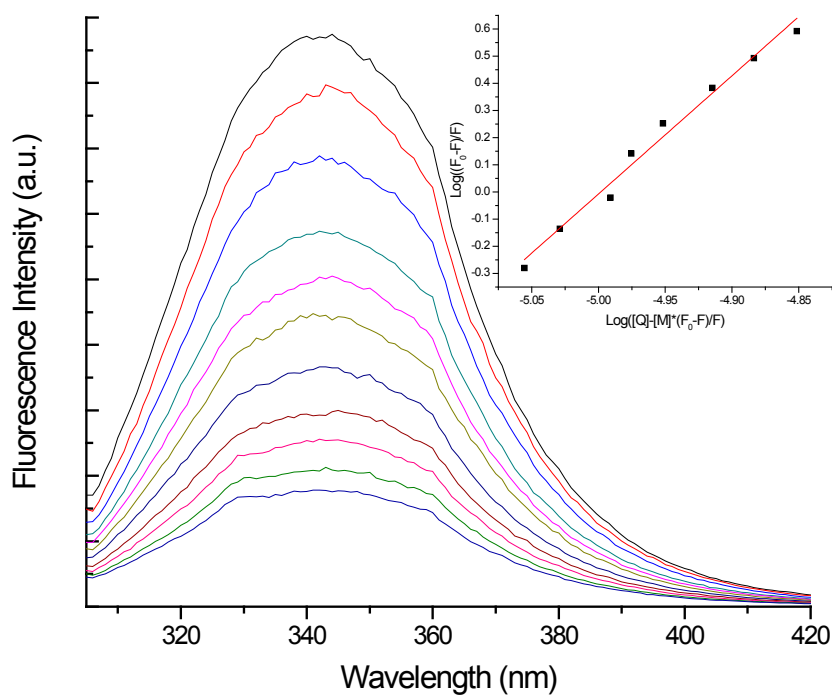

**Figure S3.** Emission fluorescence spectra of HSA in the absence and presence of different concentrations of Zr1-K2 ([HSA] =  $10^{-5}$  M, pH = 7.4). From top to bottom, the concentration of Zr1-K2 increased stepwise from 0 to  $10^{-5}$  M with increments of  $10^{-6}$  M. In the inset, the plot of the Tachiya equation is given (with  $R^2 = 0.99$ ). From the plot,  $K_a$  and  $m$  were calculated to be  $1.9 \times 10^5 \text{ M}^{-1}$  and 3.44, respectively.

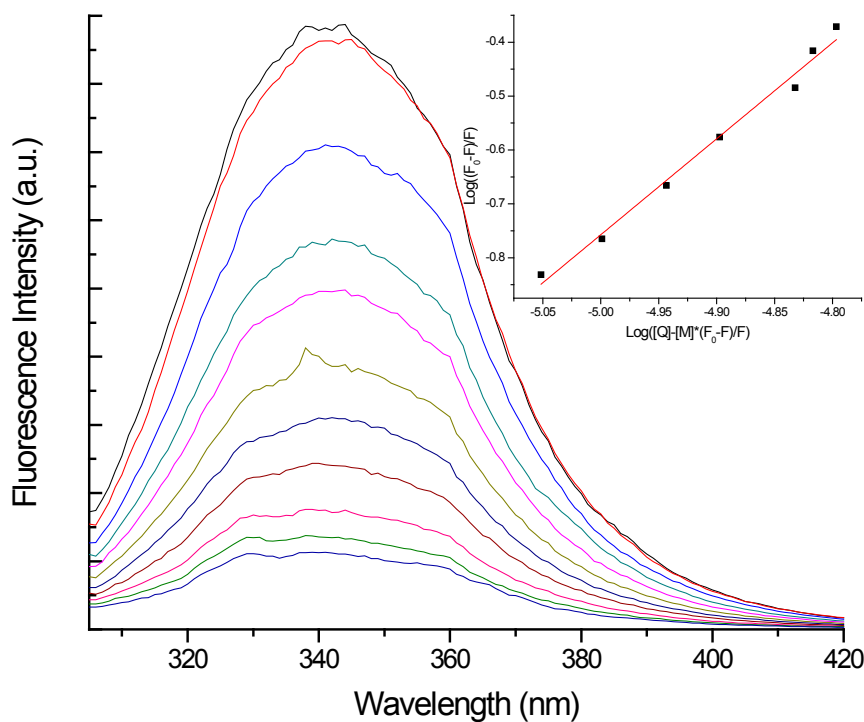

**Figure S4.** Emission fluorescence spectra of HSA in the absence and presence of different concentrations of Zr2-K2 ( $[HSA] = 10^{-5}$  M, pH = 7.4). From top to bottom, the concentration of Zr2-K2 increased stepwise from 0 to  $10^{-5}$  M with increments of  $10^{-6}$  M. In the inset, the plot of the Tachiya equation is given (with  $R^2 = 0.99$ ). From the plot,  $K_a$  and  $m$  were calculated to be  $2.5 \times 10^5$  M $^{-1}$  and 2.23, respectively.

© 2015 by the authors; licensee MDPI, Basel, Switzerland. This article is an open access article distributed under the terms and conditions of the Creative Commons Attribution license (<http://creativecommons.org/licenses/by/4.0/>).
